# Supplementary material
Source: ML conference proceedings conference paper supplement (https://proceedings.neurips.cc/paper_files/paper/2019/hash/82edc5c9e21035674d481640448049f3-Abstract.html)
Supplement: Supplementary file 2 [file 82edc5c9e21035674d481640448049f3-Supplemental.zip]

Archive with 1 entries (1 files):
- MESMO__NeurIPS_camera_ready_supp.pdf
